# Supplementary material
Source: PubMed Central journal article supplement (PMC4764078)
Supplement: NIHMS725459-supplement-002956_-_Supplemental_Material.pdf [file NIHMS725459-supplement-002956_-_Supplemental_Material.pdf]

## SUPPLEMENTAL MATERIAL

### Supplementary Figure 1

#### A. Ongoing Atrial Fibrillation

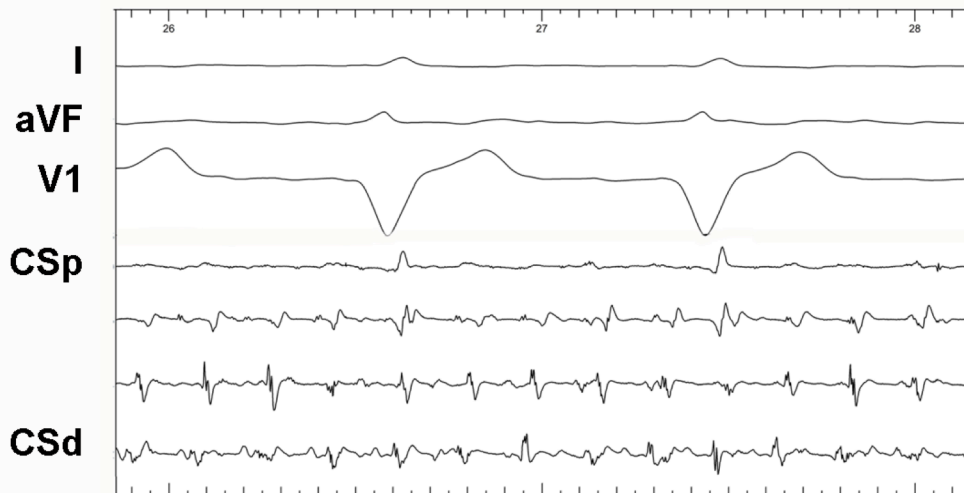

#### B. Paired RA Rotors in AF

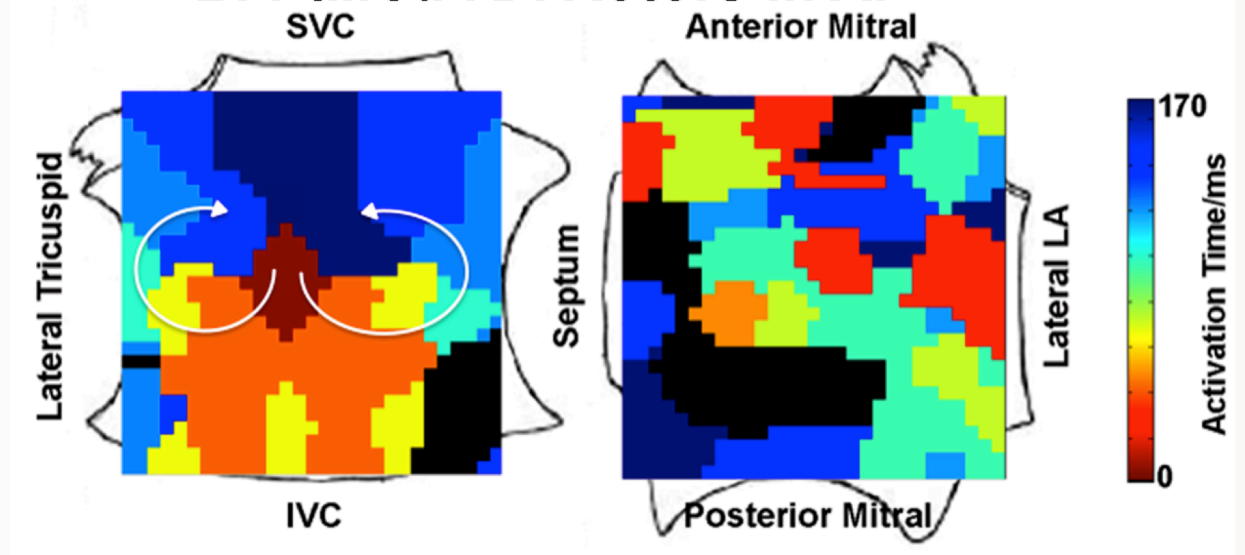

**Supplementary Figure 1. Paired clockwise and counterclockwise spiral waves during AF.** (A). Electrograms of AF. (B) Isochronal map of both atria during AF, showing paired spirals in the right atrium.

Movie 1. Elimination of re-entry due to excitable gap formation after ablation. This gap was invaded by surrounding fibrillatory waves and caused wavefront collision, thus terminating AF. See figure 2 and text for further details.

Movie 2. Elimination of re-entry due to ablation of a high excitability domain. This results in detachment of the spiral wave from the obstacle and migration outside of domain to a non-conducting boundary. See figure 3A-B for more details.

Movie 3. Elimination of re-entry due to ablation of a low excitability domain. This creates an activation front that propagates with higher wave speed and causes wavefront/tail collision and block, ultimately causing detachment and termination of re-entry. See figure 3C-E in text.

Movie 4. Terminating re-entry by ablation of an isthmus. The isthmus between the red bars has a linear gradient in diffusion constant. The mismatch in resulting CV between isthmus and surrounding tissue creates figure-of-eight reentry. See figure 5 and section V of results for further details.
